# Supplementary material
Source: publisher site journal article supplement (https://www.dovepress.com/article/443721)
Supplement: Supplementary file 1 [file get_supplementary_file.php]

Supplementary Material


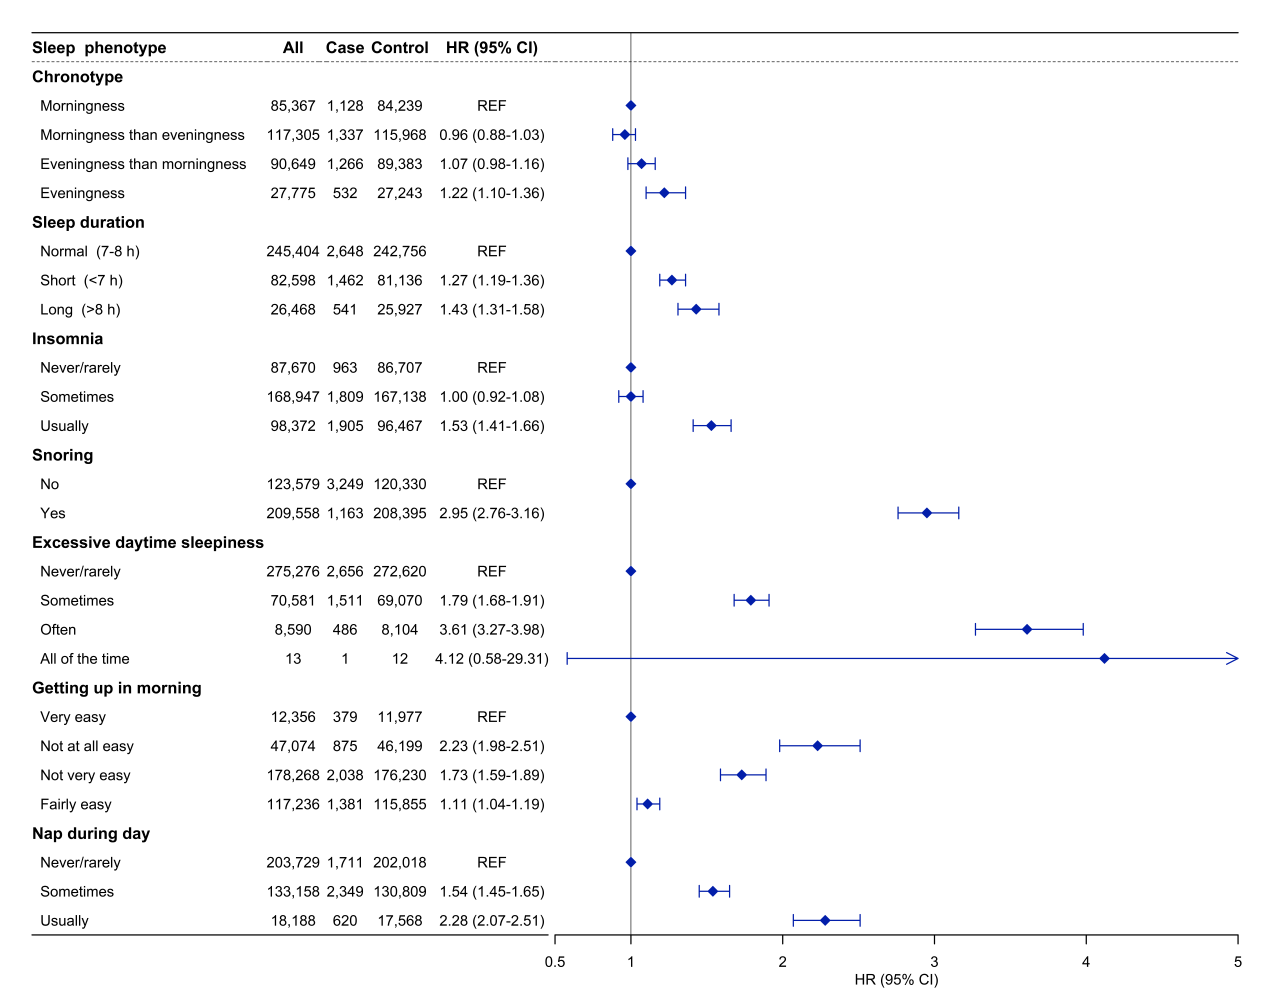


Supplementary Figure 1. Multivariable-adjusted HR (95% CI) for OSA according to sleep factors among 355,133 participants.


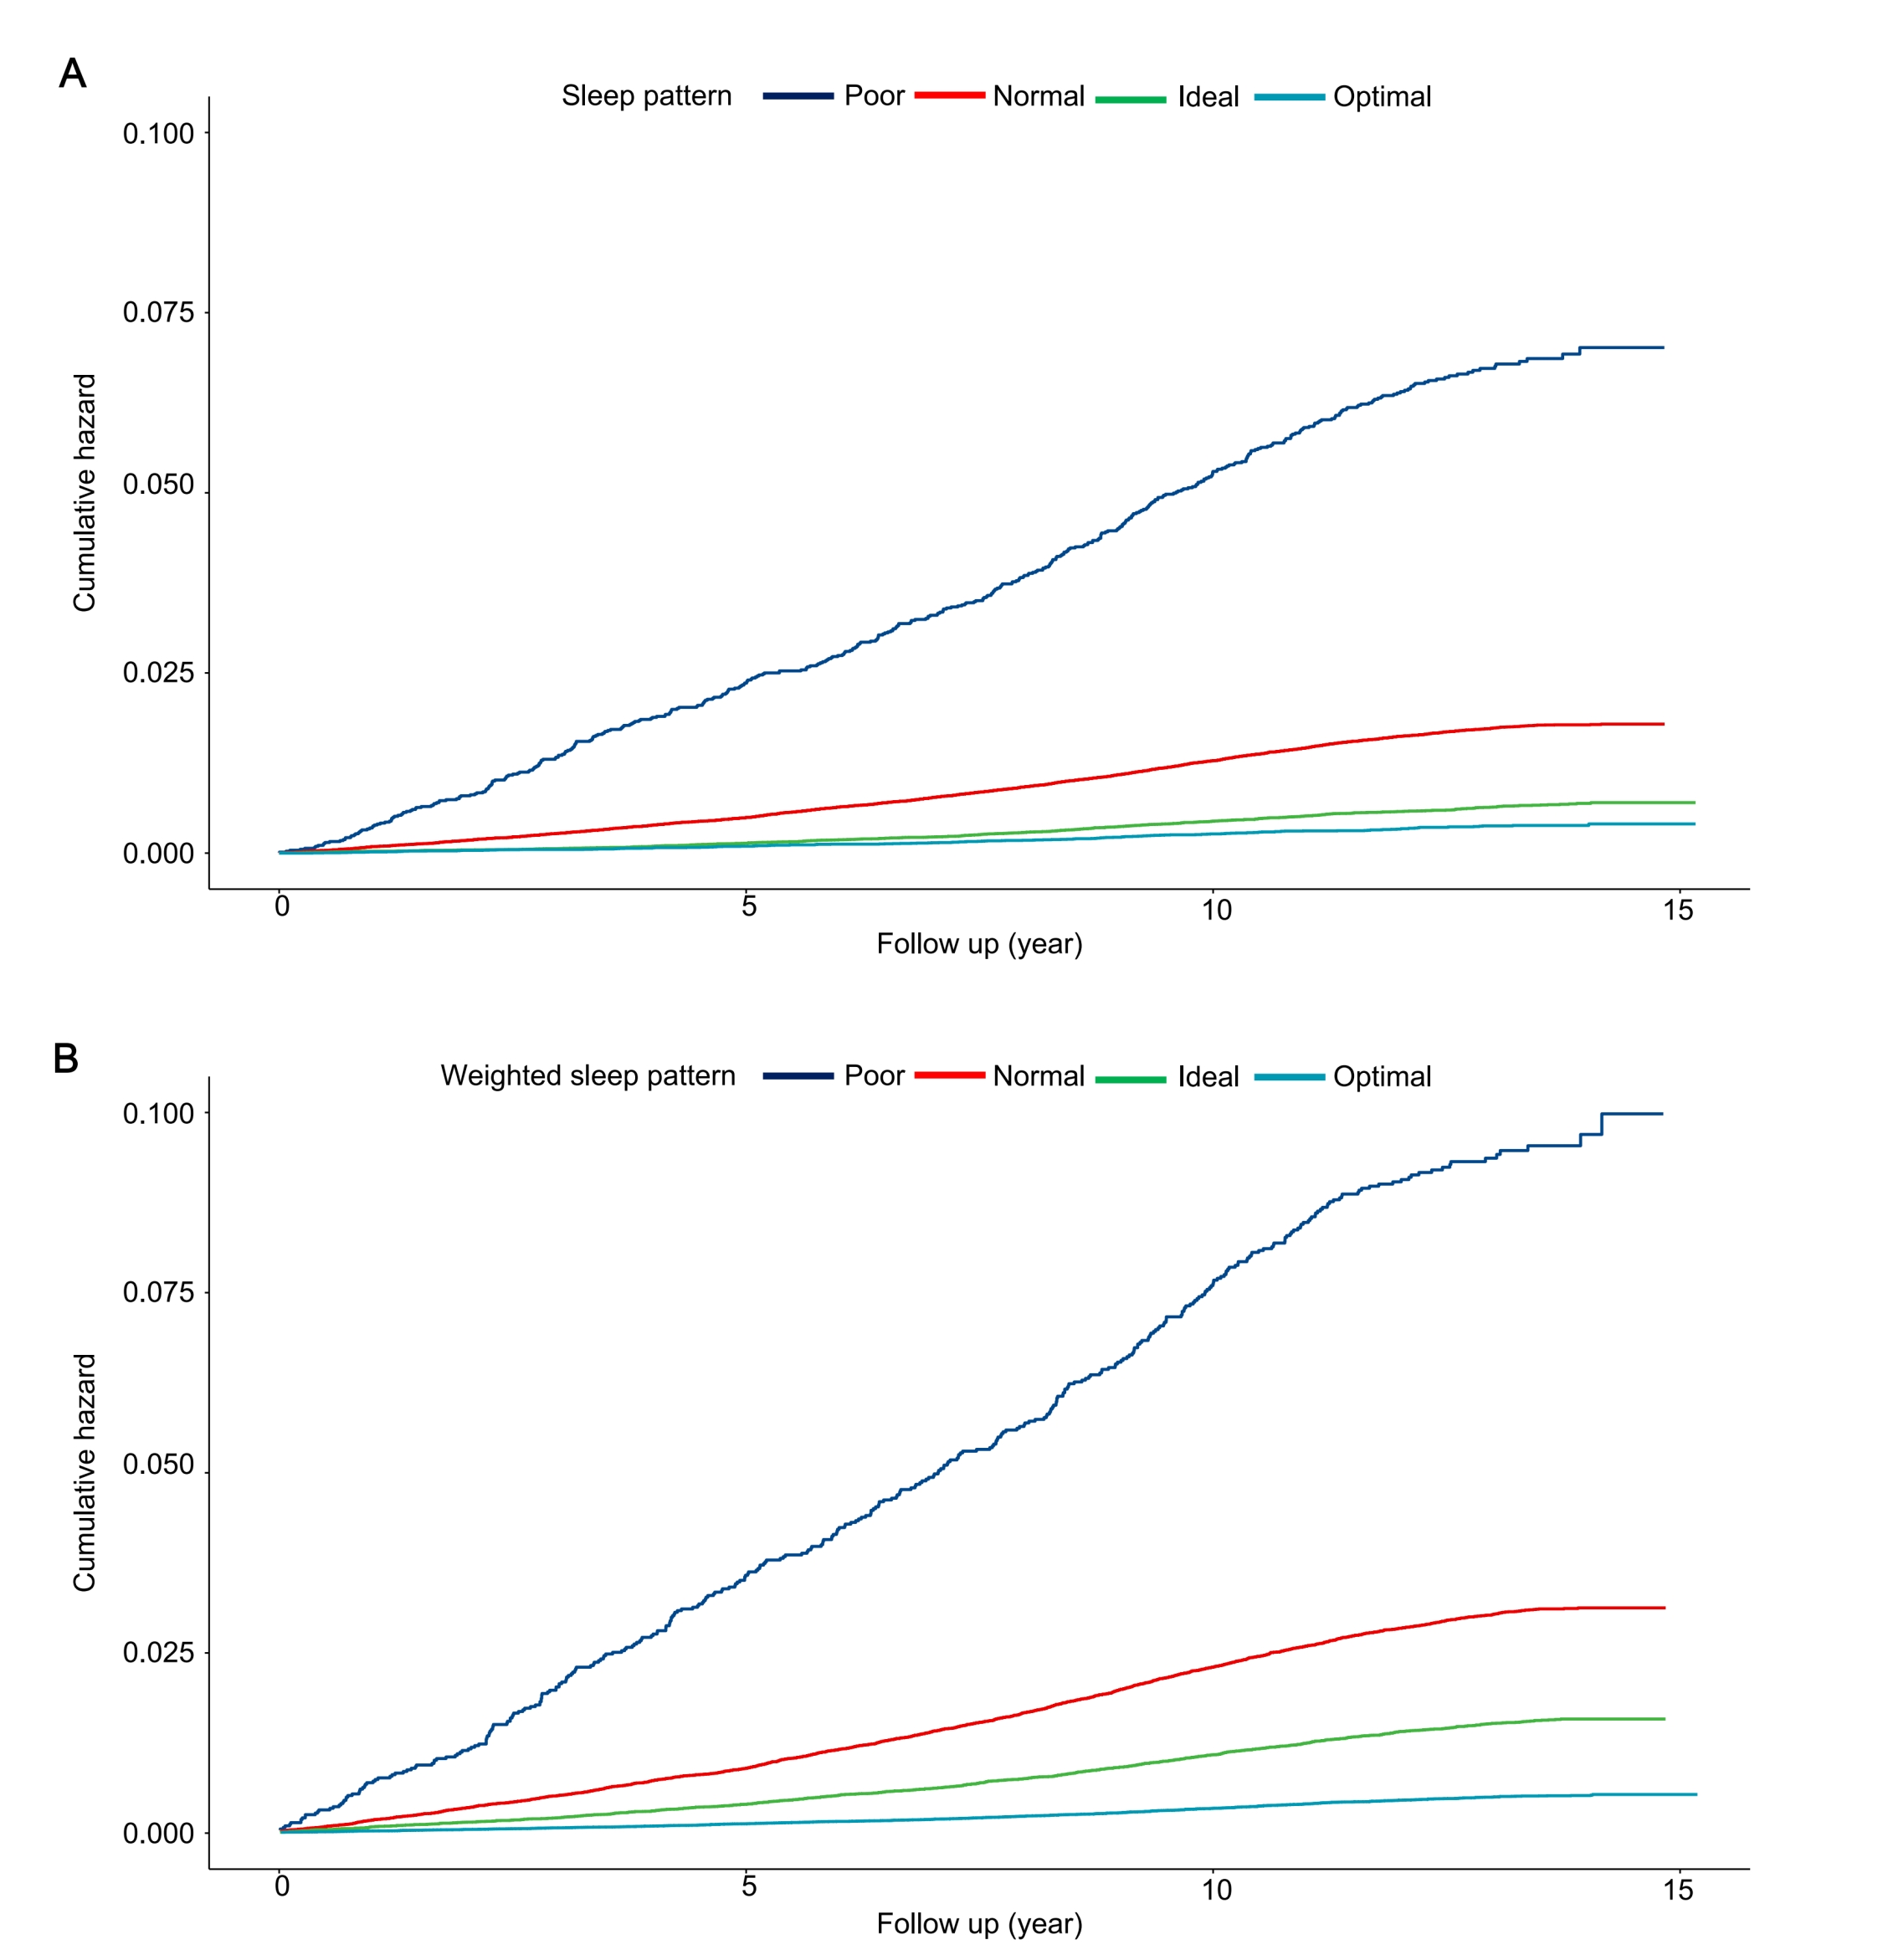


Supplementary Figure 2. Sleep Pattern and the Cumulative Risk of OSA. Note: (A)Simple Sleep Score Group; (B)Weight Sleep Score Group.


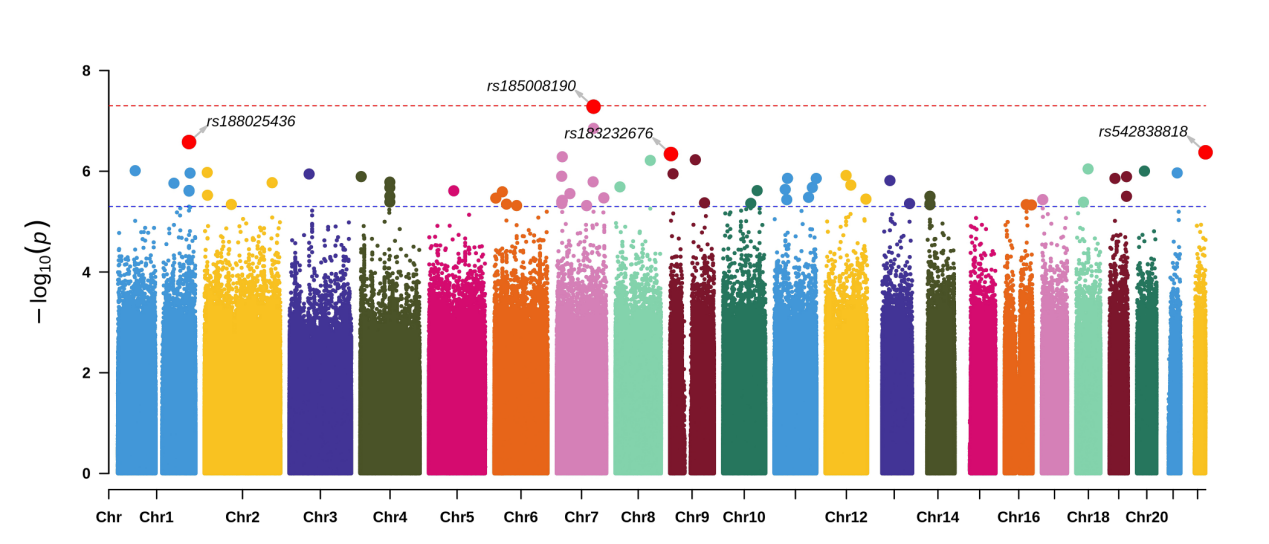


Supplementary Figure 3. Manhattan Plot of GWAS among 210,181 Participants.

Supplementary Table 1. Cox regression analysis of the influence of sleep phenotypes on OSA among 355,133 participants.

| Sleep phenotype | Model1* | | |  | Model2† | | |  | Model3‡ | | |
| --- | --- | --- | --- | --- | --- | --- | --- | --- | --- | --- | --- |
| β | HR (95% CI) | p |  | β | HR (95% CI) | p |  | β | HR(95% CI) | p |
| Chronotype |  |  |  |  |  |  |  |  |  |  |  |
| Morningness | REF | REF | REF |  | REF | REF | REF |  | REF | REF | REF |
| Morningness than eveningness | -0.15 | 0.86 (0.79-0.93) | <0.001 |  | -0.15 | 0.86 (0.79-0.93) | <0.001 |  | -0.05 | 0.96(0.88-1.03) | 0.261 |
| Eveningness than morningness | 0.05 | 1.06 (0.97-1.14) | 0.180 |  | 0.05 | 1.05 (0.97-1.14) | 0.237 |  | 0.06 | 1.07(0.98-1.16) | 0.119 |
| Eveningness | 0.38 | 1.46 (1.32-1.62) | <0.001 |  | 0.36 | 1.44 (1.30-1.59) | <0.001 |  | 0.20 | 1.22(1.10-1.36) | <0.001 |
| Sleep duration |  |  |  |  |  |  |  |  |  |  |  |
| Normal (7-8 h) | REF | REF | REF |  | REF | REF | REF |  | REF | REF | REF |
| Short (≤6 h) | 0.50 | 1.66 (1.55-1.77) | <0.001 |  | 0.50 | 1.64 (1.54-1.75) | <0.001 |  | 0.24 | 1.27(1.19-1.36) | <0.001 |
| Long (≥9h) | 0.67 | 1.95 (1.78-2.14) | <0.001 |  | 0.69 | 1.99 (1.81-2.18) | <0.001 |  | 0.36 | 1.43(1.31-1.58) | <0.001 |
| Insomnia |  |  |  |  |  |  |  |  |  |  |  |
| Never/rarely | REF | REF | REF |  | REF | REF | REF |  | REF | REF | REF |
| Sometimes | -0.02 | 0.98 (0.90-1.06) | 0.546 |  | 0.10 | 1.11 (1.02-1.20) | 0.013 |  | 0.00 | 1.00(0.92-1.08) | 0.988 |
| Usually | 0.58 | 1.78 (1.65-1.93) | <0.001 |  | 0.76 | 2.14 (1.97-2.31) | <0.001 |  | 0.42 | 1.53(1.41-1.66) | <0.001 |
| Snoring |  |  |  |  |  |  |  |  |  |  |  |
| No | REF | REF | REF |  | REF | REF | REF |  | REF | REF | REF |
| Yes | 1.57 | 4.79 (4.48-5.12) | <0.001 |  | 1.43 | 4.19 (3.91-4.48) | <0.001 |  | 1.08 | 2.95(2.76-3.16) | <0.001 |
| Excessive daytime sleepiness |  |  |  |  |  |  |  |  |  |  |  |
| Never/rarely | REF | REF | REF |  | REF | REF | REF |  | REF | REF | REF |
| Sometimes | 0.82 | 2.26 (2.12-2.41) | <0.001 |  | 0.78 | 2.19 (2.06-2.34) | <0.001 |  | 0.58 | 1.79(1.68-1.91) | <0.001 |
| Often | 1.82 | 6.16 (5.60-6.79) | <0.001 |  | 1.78 | 5.94 (5.39-6.54) | <0.001 |  | 1.28 | 3.61(3.27-3.98) | <0.001 |
| All the time | 2.14 | 8.52 (1.20-60.52) | 0.032 |  | 2.05 | 7.8 (1.10-55.40) | 0.040 |  | 1.42 | 4.12(0.58-29.31) | 0.157 |
| Getting up in morning |  |  |  |  |  |  |  |  |  |  |  |
| Very easy | REF | REF | REF |  | REF | REF | REF |  | REF | REF | REF |
| Not at all easy | 0.97 | 2.64 (2.35-2.95) | <0.001 |  | 1.26 | 3.53 (3.14-3.96) | <0.001 |  | 0.80 | 2.23(1.98-2.51) | <0.001 |
| Not very easy | 0.45 | 1.57 (1.44-1.71) | <0.001 |  | 0.68 | 1.98 (1.81-2.16) | <0.001 |  | 0.55 | 1.73(1.59-1.89) | <0.001 |
| Fairly easy | -0.04 | 0.96 (0.90-1.03) | 0.283 |  | 0.08 | 1.09 (1.01-1.16) | 0.020 |  | 0.10 | 1.11(1.04-1.19) | 0.003 |
| Nap during day |  |  |  |  |  |  |  |  |  |  |  |
| Never/rarely | REF | REF | REF |  | REF | REF | REF |  | REF | REF | REF |
| Sometimes | 0.76 | 2.14 (2.01-2.28) | <0.001 |  | 0.71 | 2.03 (1.90-2.16) | <0.001 |  | 0.43 | 1.54(1.45-1.65) | <0.001 |
| Usually | 1.45 | 4.27 (3.89-4.68) | <0.001 |  | 1.29 | 3.64 (3.31-4.00) | <0.001 |  | 0.82 | 2.28(2.07-2.51) | <0.001 |

Note: * Model 1: unadjusted; †Model 2: adjusted for sex, age; ‡Model 3: adjusted for sex, age, BMI, TDI, MET, smoking, drink, diabetes, hypertension.

Supplementary Table 2. Subgroup analysis of healthy sleep scores and incident OSA in multivariate models.

|  | β | HR (95% CI) | *p* interaction |
| --- | --- | --- | --- |
| Total | -0.38 | 0.69 (0.67-0.70) |  |
| Sex |  |  | <0.001 |
| Men | -0.42 | 0.66 (0.63-0.69) |  |
| Women | -0.32 | 0.72 (0.70-0.75) |  |
| Age |  |  | 0.389 |
| <60 y | -0.36 | 0.70 (0.68-0.72) |  |
| ≥60 y | -0.35 | 0.71 (0.68-0.73) |  |
| Waist circumstance (WC) |  |  | 0.036 |
| Healthy | -0.38 | 0.68 (0.65-0.71) |  |
| Unhealthy | -0.37 | 0.69 (0.67-0.71) |  |
| BMI |  |  | 0.040 |
| Non-obese | -0.34 | 0.71 (0.66-0.76) |  |
| Obese | -0.36 | 0.70 (0.66-0.74) |  |
| Metabolic equal intensity |  |  | 0.697 |
| Inactive | -0.35 | 0.70 (0.68-0.72) |  |
| Normal | -0.37 | 0.69 (0.61-0.79) |  |
| Active | -0.38 | 0.69 (0.67-0.70) |  |
| Smoking status |  |  | 0.686 |
| Non-current smoker | -0.41 | 0.66 (0.64-0.69) |  |
| Current smoker | -0.35 | 0.70 (0.68-0.73) |  |
| Drinking status |  |  | 0.818 |
| Non-current drinking | -0.38 | 0.68 (0.66-0.70) |  |
| Current drinkin | -0.34 | 0.71 (0.67-0.76) |  |
| Diabetes |  |  | 0.353 |
| Non-diabetes | -0.43 | 0.65 (0.62-0.68) |  |
| Diabetes | -0.34 | 0.71 (0.69-0.73) |  |
| Hypertension |  |  | 0.004 |
| Non-hypertension | -0.42 | 0.66 (0.63-0.69) |  |
| Hypertension | -0.33 | 0.72 (0.70-0.74) |  |
| BMI+WC |  |  | 0.145 |
| Obese+unhealthy | -0.35 | 0.70 (0.68-0.73) |  |
| Obese+healthy | -0.33 | 0.72 (0.63-0.82) |  |
| Non-obese+unhealthy | -0.44 | 0.70 (0.65-0.75) |  |
| Non-obese+healthy | -0.36 | 0.65 (0.62-0.68) |  |
| BMI+Hypertension |  |  | 0.464 |
| Obese+hypertension | -0.33 | 0.72 (0.69-0.74) |  |
| Obese+non-hypertension | -0.40 | 0.67 (0.63-0.72) |  |
| Non-obese+hypertension | -0.36 | 0.69 (0.66-0.73) |  |
| Non-obese+non-hypertension | -0.46 | 0.63 (0.60-0.67) |  |

Supplementary Table 3. Weight sleep score association with incident OSA.

|  | All | Case | control | Cases/1000 PYs | Model1* | |  | Model2† | |  | Model3‡ | |
| --- | --- | --- | --- | --- | --- | --- | --- | --- | --- | --- | --- | --- |
|  | β | HR (95% CI) |  | β | HR (95% CI) |  | β | HR (95% CI) |
| Weighted score* |  |  |  |  |  |  |  |  |  |  |  |  |
| Poor | 4,537 | 389 | 4,148 | 7.20 | REF | REF |  | REF | REF |  | REF | REF |
| Normal | 80,703 | 2,281 | 78,422 | 2.28 | -1.16 | 0.31 (0.28-0.35) |  | -1.15 | 0.32 (0.28-0.35) |  | -0.84 | 0.43 (0.39-0.48) |
| Ideal | 77,778 | 1,116 | 76,662 | 1.14 | -1.85 | 0.16 (0.14-0.18) |  | -1.82 | 0.16 (0.14-0.18) |  | -1.28 | 0.28 (0.25-0.31) |
| Optimal | 192,115 | 895 | 191,220 | 0.38 | -2.98 | 0.05 (0.05-0.06) |  | -2.86 | 0.06 (0.05-0.06) |  | -2.10 | 0.12 (0.11-0.14) |

Note: * Model 1: unadjusted; †Model 2: adjusted for sex, age; ‡Model 3: adjusted for sex, age, BMI, TDI, MET, smoking, drink, diabetes, hypertension.

Supplementary Table 4. Sensitivity analysis excludes healthy sleep pattern scores and risk of onset of OSA in snoring participants.

| Sleep pattern | All | Case | Control | Cases/1000 PYs | Model1* | |  | Model2† | |  | Model3‡ | |
| --- | --- | --- | --- | --- | --- | --- | --- | --- | --- | --- | --- | --- |
| β | HR (95% CI) |  | β | HR (95% CI) |  | β | HR (95% CI) |
| Poor | 7,373 | 434 | 6,939 | 4.85 | REF | REF |  | REF | REF |  | REF | REF |
| Normal | 211,718 | 3,270 | 208,448 | 2.17 | -1.38 | 0.25 (0.23-0.28) |  | -1.39 | 0.25 (0.22-0.27) |  | -0.87 | 0.42 (0.38-0.46) |
| Ideal | 92,447 | 537 | 91,910 | 1.39 | -2.37 | 0.09 (0.08-0.11) |  | -2.33 | 0.10 (0.09-0.11) |  | -1.54 | 0.21 (0.19-0.24) |
| Optimal | 42,013 | 146 | 41,867 | 0.89 | -2.88 | 0.06 (0.05-0.07) |  | -2.83 | 0.06 (0.05-0.07) |  | -1.88 | 0.15 (0.13-0.19) |

Note: * Model 1: unadjusted; †Model 2: adjusted for sex, age; ‡Model 3: adjusted for sex, age, BMI, TDI, MET, smoking, drink, diabetes, hypertension.

Supplementary Table 5. SNPs significantly associated with OSA (p < 5 × 10−6) were detected in 210,181 UK Biobank participants.

| chr | pos | p | ID | ref/alt | gene_locus | tf_motif | top_lead_ID | top_lead_p |
| --- | --- | --- | --- | --- | --- | --- | --- | --- |
| 7 | 118085349 | 5.22 × 10−8 | rs185008190 | C/T | ANKRD7 | STAT3_HM01147 | rs185008190 | 5.22 × 10−8 |
| 7 | 118083867 | 1.41 × 10−7 | rs185340414 |  |  |  |  |  |
| 1 | 228253490 | 2.63 × 10−7 | rs188025436 |  |  |  |  |  |
| 22 | 51019334 | 4.21 × 10−7 | rs542838818 | G/A | CHKB-CPT1B，CHKB | DNMT1_HM00745 | rs542838818 | 4.21 × 10−7 |
| 9 | 3078060 | 4.55 × 10−7 | rs183232676 | G/C | 9p24.2 | IRF2_HM02746 | rs183232676 | 4.55 × 10−7 |
| 7 | 17907223 | 5.16 × 10−7 | rs192442711 | A/G | SNX13 | GATA2_HM02273 | rs192442711 | 5.16 × 10−7 |
| 9 | 81088866 | 5.91 × 10−7 | rs191415405 |  |  |  |  |  |
| 8 | 111889337 | 6.09 × 10−7 | rs117225693 | T/C | 8q23.2 | SRF_HM08530 | rs117225693 | 6.09 × 10−7 |
| 18 | 38096701 | 8.99 × 10−7 | rs187046611 |  |  |  |  |  |
| 1 | 55856902 | 9.75 × 10−7 | rs547583219 | A/G | 1p32.3 | CDK2_HM06692 | rs547583219 | 9.75 × 10−7 |
| 20 | 23939999 | 9.92 × 10−7 | rs34787149 | G/T | 20p11.21 | NRF1_HM03158 | rs34787149 | 9.92 × 10−7 |
| 2 | 8578642 | 1.06 × 10−6 | rs187975979 | C/T | 2p25.1 | CCNT2_HM02841 | rs187975979 | 1.06 × 10−6 |
| 21 | 37143339 | 1.08 × 10−6 | rs777562976 | A/G | RUNX1 | FOXA3_HM08414 | rs777562976 | 1.08 × 10−6 |
| 1 | 231627278 | 1.09 × 10−6 | rs554500108 | C/G | 1q42.2 | IRF5_HM00136 | rs554500108 | 1.09 × 10−6 |
| 9 | 9629169 | 1.12 × 10−6 | rs536929495 | G/A | PTPRD | REST_HM02744 | rs536929495 | 1.12 × 10−6 |
| 3 | 62929818 | 1.13 × 10−6 | rs565239546 | C/T | 3p14.2 | STAT5A_HM01151 | rs565239546 | 1.13 × 10−6 |
| 12 | 66000987 | 1.21 × 10−6 | rs117335380 | G/A | AC025419.1，LINC02454 | EZH2_HM10144 | rs117335380 | 1.21 × 10−6 |
| 7 | 15949240 | 1.26 × 10−6 | rs762007737 | T/C | 7p21.2 | E2F1_HM00627 | rs762007737 | 1.26 × 10−6 |
| 4 | 3064001 | 1.28 × 10−6 | rs553351829 | C/T | 4p16.3 | BHLHE40_HM02850 | rs553351829 | 1.28 × 10−6 |
| 19 | 54396034 | 1.28 × 10−6 | rs534836181 |  |  |  |  |  |
| 11 | 42089992 | 1.38 × 10−6 | rs149491344 |  |  |  |  |  |
| 19 | 17478197 | 1.39 × 10−6 | 19:17478197 |  |  |  |  |  |
| 11 | 134125309 | 1.39 × 10−6 | rs759369406 | C/T | ACAD8 | HEY1_HM00291 | rs759369406 | 1.39 × 10−6 |
| 13 | 43804034 | 1.53 × 10−6 | rs771162244 | C/T | ENOX1 | DNMT1_HM00745 | rs771162244 | 1.53 × 10−6 |
| 7 | 116588231 | 1.62 × 10−6 | rs536671285 | G/A | 7q31.2 | SUZ12_HM07214 | rs536671285 | 1.62 × 10−6 |
| 4 | 94874743 | 1.64 × 10−6 | rs144668555 |  |  |  |  |  |
| 2 | 216549888 | 1.69 × 10−6 | rs182179660 | T/C | AC012668.3，LINC00607 | CUX1_HM08349 | rs182179660 | 1.69 × 10−6 |
| 1 | 179976640 | 1.73 × 10−6 | rs183952659 | C/T | CEP350 | JUNB_HM06535 | rs183952659 | 1.73 × 10−6 |
| 12 | 81136297 | 1.88 × 10−6 | rs573155374 | G/A | 12q21.31 | PRDM1_HM01423 | rs573155374 | 1.88 × 10−6 |
| 8 | 14603012 | 2.04 × 10−6 | rs188569031 |  |  |  |  |  |
| 11 | 121679603 | 2.10 × 10−6 | rs113896794 | G/A | 11q24.1 | TAF2_HM07221 | rs113896794 | 2.10 × 10−6 |
| 4 | 94841577 | 2.12 × 10−6 | rs116074136 |  |  |  |  |  |
| 11 | 34854456 | 2.29 × 10−6 | rs145402192 |  |  |  |  |  |
| 1 | 228451629 | 2.41 × 10−6 | rs572247481 | A/G | OBSCN | HDAC1_HM06849 | rs572247481 | 2.41 × 10−6 |
| 10 | 109179061 | 2.42 × 10−6 | rs571941180 | G/T | 10q25.1 | STAT3_HM01147 | rs571941180 | 2.42 × 10−6 |
| 5 | 79809081 | 2.45 × 10−6 | rs146663236 | C/T | FAM151B | HNF4A_HM08596 | rs146663236 | 2.45 × 10−6 |
| 1 | 228467969 | 2.48 × 10−6 | rs202052558 | G/A | OBSCN | ZBTB33_HM02840 | rs202052558 | 2.48 × 10−6 |
| 6 | 25738781 | 2.56 × 10−6 | rs575782535 | A/G | 6p22.2 | IRF1_HM01056 | rs575782535 | 2.56 × 10−6 |
| 7 | 42336532 | 2.78 × 10−6 | rs541293470 | G/A | 7p14.1 | STAT3_HM01147 | rs541293470 | 2.78 × 10−6 |
| 2 | 9388012 | 2.99 × 10−6 | rs557741549 | C/T | ASAP2 | DNMT1_HM00745 | rs557741549 | 2.99 × 10−6 |
| 4 | 94925721 | 3.13 × 10−6 | 4:94925721 |  |  |  |  |  |
| 14 | 28111213 | 3.14 × 10−6 | rs7157400 |  |  |  |  |  |
| 19 | 54355259 | 3.14 × 10−6 | rs548258857 | C/T | 19q13.42 | SUZ12_HM07214 | rs548258857 | 3.14 × 10−6 |
| 14 | 28113428 | 3.17 × 10−6 | rs12885575 |  |  |  |  |  |
| 11 | 109584796 | 3.29 × 10−6 | rs181285647 | A/C | 11q22.3 | ZBTB1_HM00731 | rs181285647 | 3.29 × 10−6 |
| 7 | 150985467 | 3.38 × 10−6 | rs569709187 | C/A | 7q36.1 | CUX1_HM02915 | rs569709187 | 3.38 × 10−6 |
| 7 | 150973895 | 3.38 × 10−6 | rs537389714 | G/A | SMARCD3 | STAT6_HM01153 | rs537389714 | 3.38 × 10−6 |
| 6 | 4763698 | 3.41 × 10−6 | rs560121932 | A/C | CDYL | TAF2_HM07219 | rs560121932 | 3.41 × 10−6 |
| 12 | 129532254 | 3.57 × 10−6 | rs545955322 | A/G | 12q24.33 | SOX6_HM06559 | rs545955322 | 3.57 × 10−6 |
| 17 | 2845275 | 3.66 × 10−6 | rs551436401 | C/T | RAP1GAP2 | BHLHE40_HM02850 | rs551436401 | 3.66 × 10−6 |
| 11 | 39701506 | 3.66 × 10−6 | rs751769861 | A/C | 11p12 | WRNIP1_HM10643 | rs751769861 | 3.66 × 10−6 |
| 7 | 17692862 | 3.78 × 10−6 | rs115367368 | C/T | 7p21.1 | STAT1_HM01443 | rs115367368 | 3.78 × 10−6 |
| 7 | 17979614 | 3.85 × 10−6 | rs185165991 | G/A | SNX13 | HDAC1_HM06849 | rs185165991 | 3.85 × 10−6 |
| 7 | 16236523 | 3.98 × 10−6 | rs149043005 | G/A | ISPD | HOXA1_HM07598 | rs149043005 | 3.98 × 10−6 |
| 4 | 94882576 | 4.08 × 10−6 | rs11731310 |  |  |  |  |  |
| 18 | 23229957 | 4.11 × 10−6 | rs575588611 | A/G | 18q11.2 | BCL11A_HM10041 | rs575588611 | 4.11 × 10−6 |
| 9 | 110535701 | 4.24 × 10−6 | rs138828336 | G/C | 9q31.2 | CTBP1_HM06756 | rs138828336 | 4.24 × 10−6 |
| 10 | 88799856 | 4.34 × 10−6 | rs192033740 | C/T | 10q23.2 | HDAC1_HM06849 | rs192033740 | 4.34 × 10−6 |
| 7 | 16297524 | 4.36 × 10−6 | rs74419941 | C/T | ISPD，ISPD-AS1 | ZBTB33_HM02590 | rs74419941 | 4.36 × 10−6 |
| 13 | 106641906 | 4.38 × 10−6 | rs113756255 | A/C | 13q33.2 | ZBTB1_HM00731 | rs113756255 | 4.38 × 10−6 |
| 14 | 28111896 | 4.40 × 10−6 | rs36018313 |  |  |  |  |  |
| 6 | 39017406 | 4.49 × 10−6 | rs575543504 | C/T | GLP1R | SP1_HM02021 | rs575543504 | 4.49 × 10−6 |
| 2 | 85804480 | 4.56 × 10−6 | rs566280086 | G/A | VAMP8 | STAT3_HM01147 | rs566280086 | 4.56 × 10−6 |
| 16 | 69121414 | 4.60 × 10−6 | rs572452961 | C/T | 16q22.1 | MEF2B_HM03902 | rs572452961 | 4.60 × 10−6 |
| 14 | 28108316 | 4.63 × 10−6 | rs17445609 |  |  |  |  |  |
| 16 | 85788060 | 4.67 × 10−6 | rs192254272 | C/T | 16q24.1 | EBF1_HM03824 | rs192254272 | 4.67 × 10−6 |
| 6 | 71585501 | 4.80 × 10−6 | rs548053121 | C/T | B3GAT2 | SRF_HM08530 | rs548053121 | 4.80 × 10−6 |
| 7 | 95859013 | 4.81 × 10−6 | rs548225690 | G/A | SLC25A13 | JUN_HM06510 | rs548225690 | 4.81 × 10−6 |
| 7 | 95808801 | 4.81 × 10−6 | rs552796528 | T/G | SLC25A13 | KLF1_HM02341 | rs552796528 | 4.81 × 10−6 |

Supplementary Table 6. Main findings of previous GWASs.

| Study | Participants | Sample size(case/control) | Trait | SNP | p | REF>ALT(Literature) | Nearest gene(Literature) | *p*-value in this study |
| --- | --- | --- | --- | --- | --- | --- | --- | --- |
| Strausz,Satu et al.1 | FinnGen Study | 16,761/201,194 | OSA | rs9937053 | 4.3 × 10−16 | G>A | FTO | 3.60 × 10−4 |
| rs10507084 | 2.8 × 10−11 | C>T | RMST/NEDD1 |  |
| rs185932673 | 2.4 × 10−8 | C>T | CAMK1D | 0.40 |
| rs4837016 | 1.5 × 10−8 | C>T | GAPVD1 | 0.75 |
| rs10928560 | 2.8 × 10−8 | G>A | CXCR4 |  |
| Cade,Brian E et al.2 | Hispanic/Latino Americans | 12,558 | AHI | rs116791765 | 1.90 × 10−8 | T>G | GPR83, LINC01171, MRE11A |  |
| rs999944 | 4.53 × 10−7 | A>G, T |  | 0.49 |
| Patel,Sanjay R et al.3 | CARe | 3,551 | OSA | rs7972342 | 1.5×10−6 | G>A | ITPR2 |  |
| rs7030789 | 2.3×10−6 | A>G | LPAR1 | 0.93 |
| rs1409986 | 1.0×10−6 | A>G, T | PTGER3 | 0.23 |
| rs11126184 | 1.54×10−6 | C>A, G, T | PLEK |  |
| Xu, Huajun et al.4 | Han Chinese individuals | 5,438/15,152 | OSA | rs6455893 | 6.98 × 10-10 | C>T | PACRG |  |
| rs3746804 | 7.57 × 10-10 | G>A | SLC52A3 | 0.52 |

Supplementary Table 7. OSA polygenic risk score and low-risk sleep phenotype correlation OR (95% CI) in 173,239 participants.

|  | Model1* | | |  | Model2† | | |  | Model3‡ | | |
| --- | --- | --- | --- | --- | --- | --- | --- | --- | --- | --- | --- |
|  | β | p | OR (95% CI) |  | β | p | OR (95% CI) |  | β | p | OR (95% CI) |
| Sleep 7-8 h/day | -0.90 | 0.222 | 0.41 (0.10-1.71) |  | -0.84 | 0.257 | 0.43 (0.10-1.83) |  | -0.79 | 0.285 | 0.45 (0.11-1.92) |
| Early chronotype | -0.04 | 0.950 | 0.96 (0.26-3.59) |  | 0.06 | 0.929 | 1.06 (0.28-4.00) |  | 0.14 | 0.839 | 1.15 (0.30-4.36) |
| Never/rarely insomnia | 0.58 | 0.448 | 1.79 (0.39-8.02) |  | 0.42 | 0.593 | 1.52 (0.33-6.91) |  | 0.48 | 0.538 | 1.62 (0.35-7.39) |
| No self-reported snoring | -0.32 | 0.633 | 0.72 (0.19-2.74) |  | -0.22 | 0.749 | 0.80 (0.21-3.10) |  | -0.03 | 0.963 | 0.97 (0.24-3.84) |
| No frequent daytime sleepiness | -1.90 | 0.350 | 0.15 (0.003-8.84) |  | -1.94 | 0.341 | 0.14 (0.003-8.58) |  | -1.77 | 0.388 | 0.17 (0.003-10.42) |
| No nap | 0.54 | 0.423 | 1.72 (0.46-6.47) |  | 0.52 | 0.448 | 1.69 (0.44-6.52) |  | 0.65 | 0.349 | 1.92 (0.49-7.50) |
| Easy getting up in morning | -0.90 | 0.308 | 0.41 (0.07-2.33) |  | -0.79 | 0.378 | 0.45 (0.08-2.66) |  | -0.55 | 0.543 | 0.58 (0.10-3.45) |

Note: * Model 1: unadjusted; †Model 2: adjusted for sex, age; ‡Model 3: adjusted for sex, age, BMI, TDI, MET, smoking, drink, diabetes, hypertension.

References

1. Strausz S, Ruotsalainen S, Ollila HM, et al. Genetic analysis of obstructive sleep apnoea discovers a strong association with cardiometabolic health. *Eur Respir J.* 2021;57(5):2003091.

2. Cade BE, Chen H, Stilp AM, et al. Genetic Associations with Obstructive Sleep Apnea Traits in Hispanic/Latino Americans. *Am J Respir Crit Care Med.* 2016;194(7):886-897.

3. Patel SR, Goodloe R, De G, et al. Association of genetic loci with sleep apnea in European Americans and African-Americans: the Candidate Gene Association Resource (CARe). *PLoS One.* 2012;7(11):e48836.

4. Xu H, Liu F, Li Z, et al. Genome-Wide Association Study of Obstructive Sleep Apnea and Objective Sleep-related Traits Identifies Novel Risk Loci in Han Chinese Individuals. *Am J Respir Crit Care Med.* 2022;206(12):1534-1545.
